# Supplementary material for: Inhibition of GATA2 in prostate cancer by a clinically available small molecule
Source: PubMed Central journal article supplement (PMC8634153; doi:10.1530/erc-21-0085), 2021-10-12
Supplement: supplementary_figure_1.pdf [file supplementary_figure_1.pdf]

**Suppl. Figure 1.** Using the prediction algorithm SuperPred we identified dilazep, a vasodilator, as a clinically available drug with potential inhibitory activity against GATA-2

### Input structure: K-7174

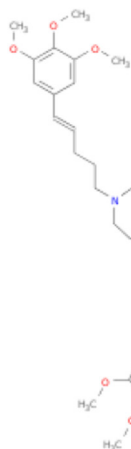

### Most similar drug

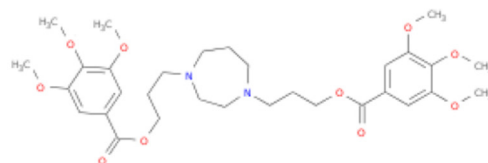

#### Information input structure

|                    |                                                                      |
|--------------------|----------------------------------------------------------------------|
| Name               | 1,4-bis[(4E)-5-(3,4,5-trimethoxyphenyl)pent-4-en-1-yl]-1,4-diazepane |
| Formula            | C <sub>33</sub> H <sub>48</sub> N <sub>2</sub> O <sub>6</sub>        |
| Molweight          | 568.744                                                              |
| xlogP              | 5.909                                                                |
| Heavy Atoms        | 41                                                                   |
| Rotatable Bonds    | 16                                                                   |
| H-bond Donors      | 0                                                                    |
| H-bond Acceptors   | 8                                                                    |
| Bonds              | 43                                                                   |
| Rings              | 3                                                                    |
| Polar Surface Area | 61.860                                                               |
| Total Charge       | 0                                                                    |

#### Drug properties

|                    |                                                                |
|--------------------|----------------------------------------------------------------|
| Name               | Dilazep                                                        |
| Formula            | C <sub>31</sub> H <sub>44</sub> N <sub>2</sub> O <sub>10</sub> |
| Molweight          | 604.688                                                        |
| logP               | 3.416                                                          |
| Heavy Atoms        | 43                                                             |
| Rotatable Bonds    | 18                                                             |
| H-bond Donors      | 0                                                              |
| H-bond Acceptors   | 12                                                             |
| Bonds              | 45                                                             |
| Rings              | 3                                                              |
| Polar Surface Area | 114.46                                                         |
| Total Charge       | 0                                                              |
