# Supplementary material for: Inhibition of GATA2 in prostate cancer by a clinically available small molecule
Source: PubMed Central journal article supplement (PMC8634153; doi:10.1530/erc-21-0085), 2021-10-12

**Suppl. Figure 2.** Heatmap representation of protein expression changes (log<sub>2</sub> scale) revealed by RPPA analysis to be differentially expressed in enzalutamide-resistant LNCaP-MDVR cells compared to parental LNCaP cells (P<0.05 & FC>1.25 or <1/1.25)

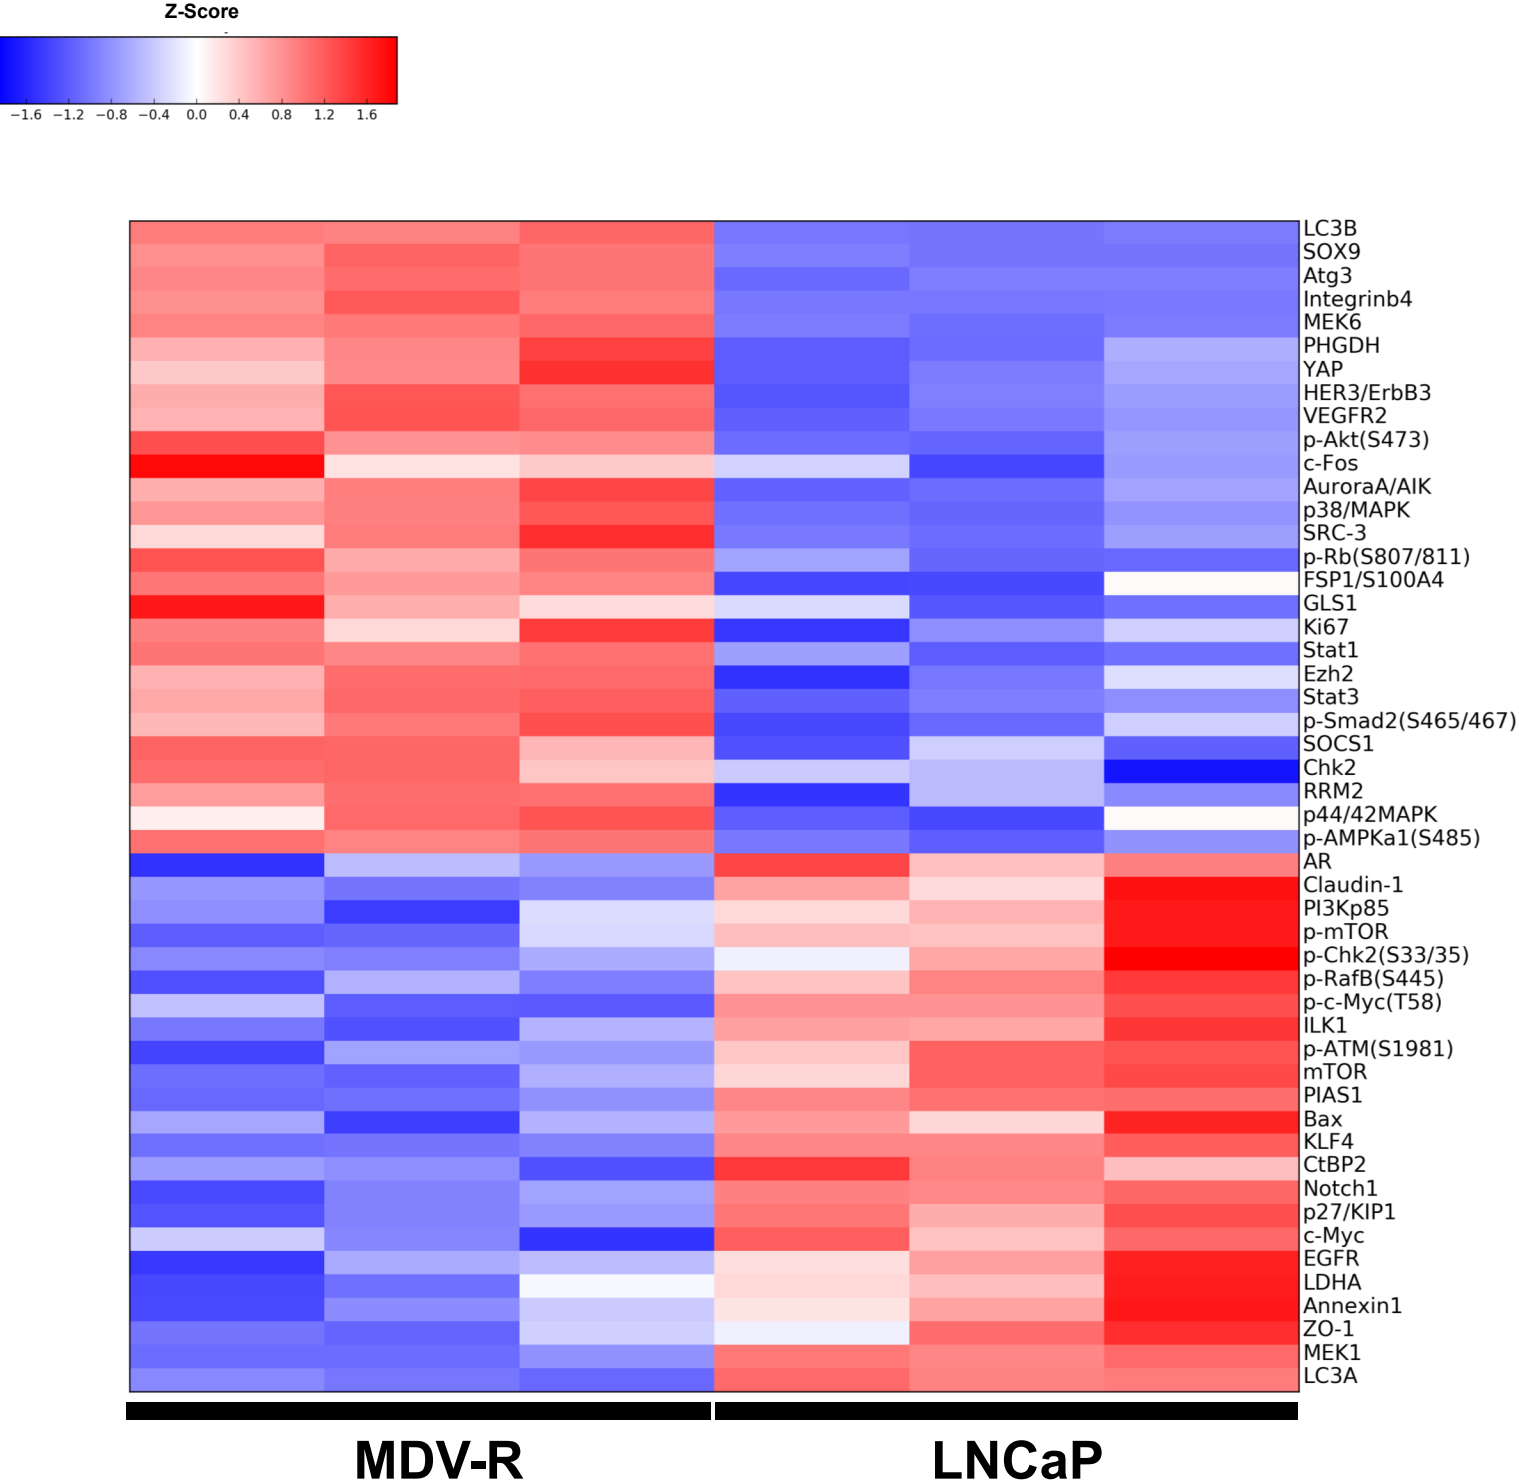

Supplement: supplementary_figure_2.pdf [file supplementary_figure_2.pdf]
