# Supplementary material for: Inhibition of GATA2 in prostate cancer by a clinically available small molecule
Source: PubMed Central journal article supplement (PMC8634153; doi:10.1530/erc-21-0085), 2021-10-12

### Suppl. Fig. 3

**A.** GATA2 siRNA inhibits growth of MDVR cells (MTT assay performed 96 hrs after siRNA transfection), similarly to its previously reported effect in LNCaP and Abl cells. siNT: Non-Target siRNA. Data are shown as average  $\pm$  SD.

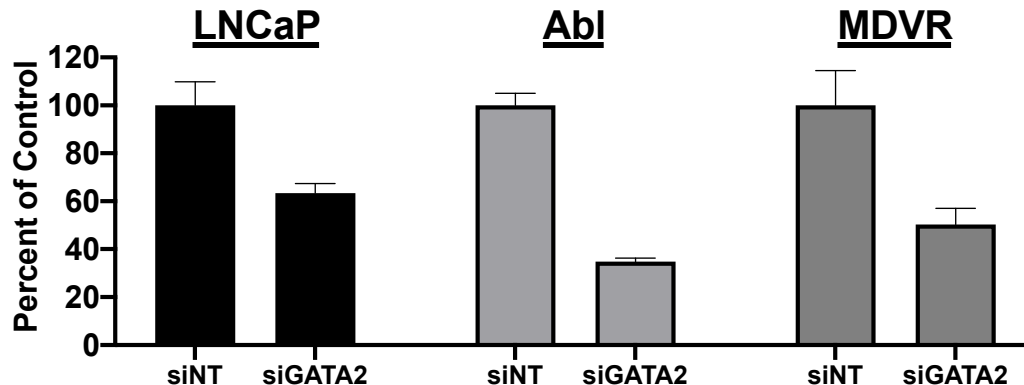

**B.** Dilazep inhibits proliferation of MDVR PC cells: MTT assay after treatment with increasing concentrations of dilazep (0-50  $\mu$ M) for 96 hrs. O.D. was calculated as absorbance at 570 nM – absorbance at 630 nM and normalized to the respective vehicle controls. Data are shown as average  $\pm$  SD.

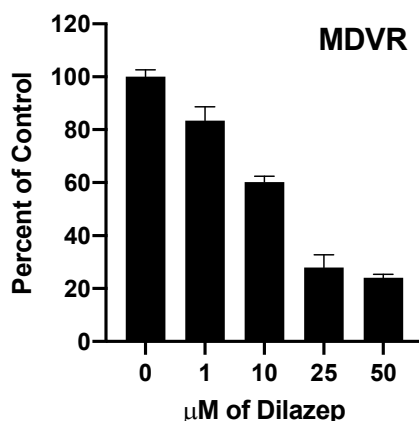

**C.** The GATA2-independent, AR-independent PC3 and RWPE-1 cells were significantly less sensitive to dilazep and only at high concentration: MTT assay after treatment with increasing concentrations of dilazep (0-50  $\mu$ M) for 96 hrs. O.D. was calculated as absorbance at 570 nM – absorbance at 630 nM and normalized to the respective vehicle controls. Data are shown as average  $\pm$  SD.

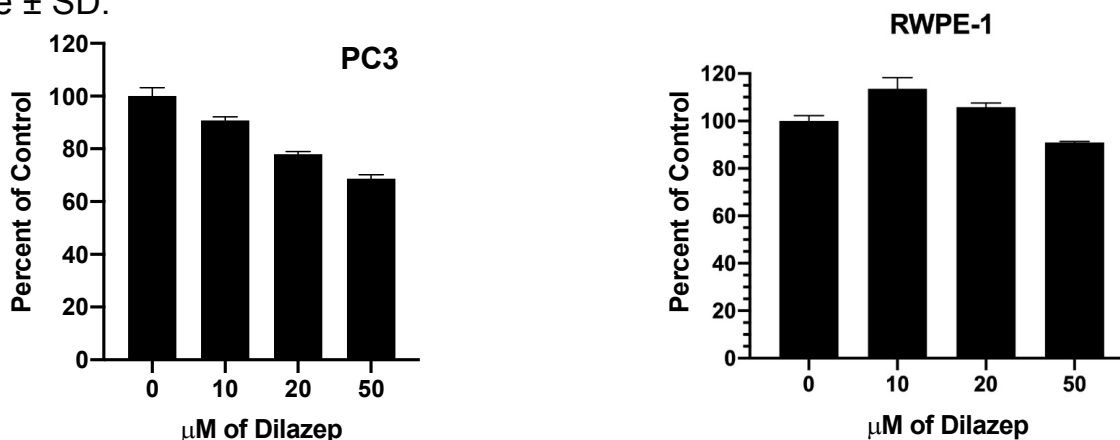

Supplement: supplementary_figure_3.pdf [file supplementary_figure_3.pdf]
