# Supplementary material for: Inhibition of GATA2 in prostate cancer by a clinically available small molecule
Source: PubMed Central journal article supplement (PMC8634153; doi:10.1530/erc-21-0085), 2021-10-12

### Suppl. Fig. 3

**D-G.** EdU proliferation assay in 22Rv1 cells (D, E) and LNCaP cells (F, G) treated with dilazep (0, 20, 50  $\mu\text{M}$ ) for 24h. Representative flow cytometry dot plots (D, F) obtained by a double labelling of the cells with EdU and DAPI. EdU incorporation into DNA (90 minute labelling with 10  $\mu\text{M}$  EdU) is displayed on the ordinate and DNA content (DAPI) is shown on the abscissa. The cells in the green S square correspond to EdU labelled cells (S phase of the cell cycle). The cells in G1 and G2 squares represent cells with a 2C (G1 phase of the cell cycle) and 4C (G2 phase of the cell cycle) DNA content respectively that did not incorporate EdU. The cells in subG1 square represent cells with a DNA content less than 2C (apoptotic cells). Bar charts (E, G) show a summary of S-phase frequency in cells grown in the presence of dilazep in independent experiments.

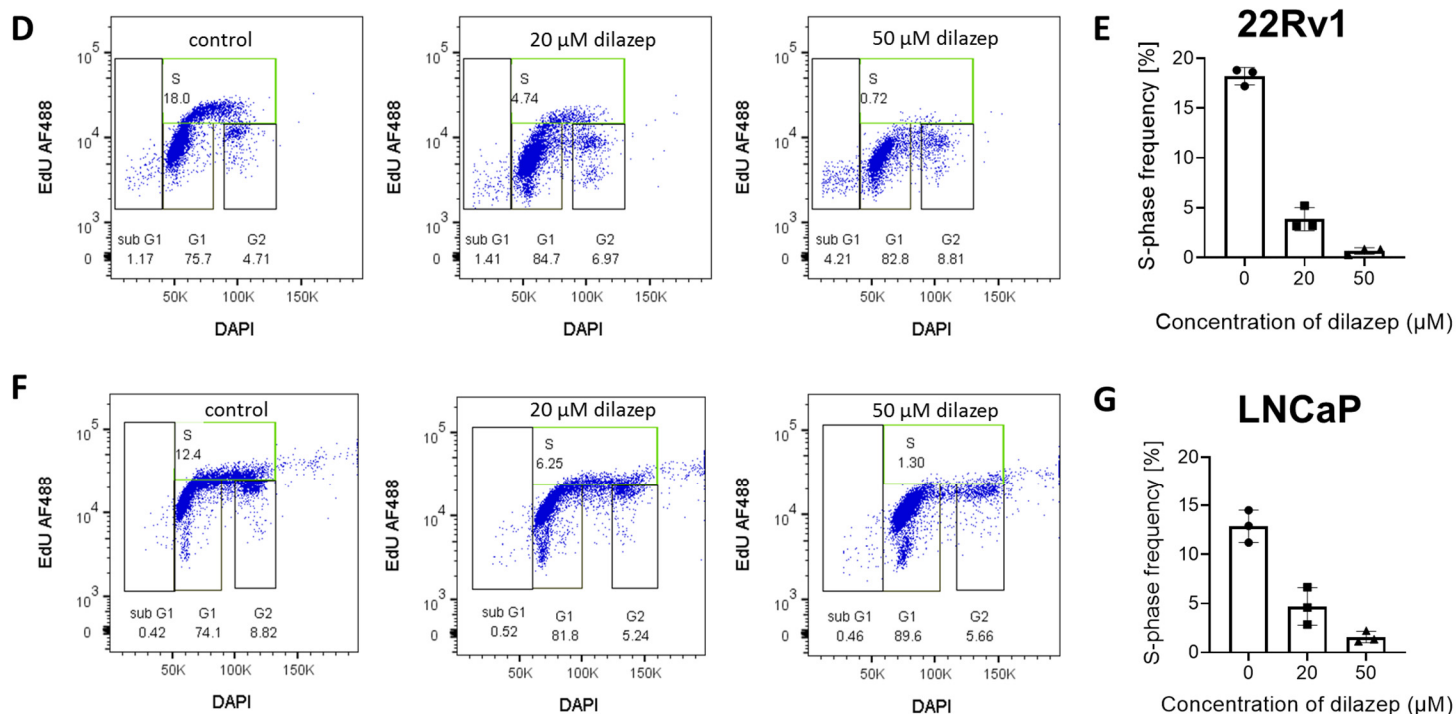

Supplement: supplementary_figure_4.pdf [file supplementary_figure_4.pdf]
