# Supplementary material for: Inhibition of GATA2 in prostate cancer by a clinically available small molecule
Source: PubMed Central journal article supplement (PMC8634153; doi:10.1530/erc-21-0085), 2021-10-12

Suppl. Fig. 4B

**Dilazep suppresses stemness-related signaling in PC cells.** Using GSEA, we analyzed our dilazep signatures, across all three PC cell lines tested, and compared them with the Molecular Signature Database (MSigDB). We found significant suppression of genesets related to embryonic stem (ES) cells and stemness. All  $P < 0.001$ .

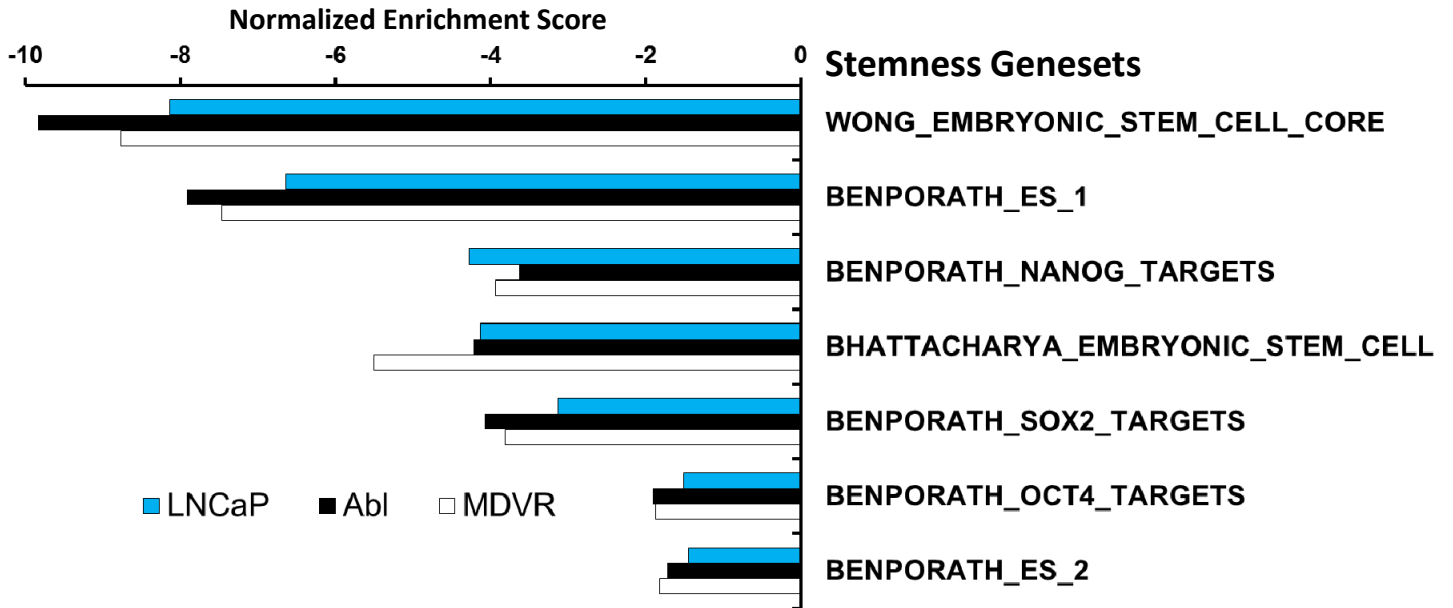

Supplement: supplementary_figure_6.pdf [file supplementary_figure_6.pdf]
