# Supplementary material for: Inhibition of GATA2 in prostate cancer by a clinically available small molecule
Source: PubMed Central journal article supplement (PMC8634153; doi:10.1530/erc-21-0085), 2021-10-12

**Suppl. Figure 5B.** Quantitative real-time RT-PCR results for selected mRNAs (AURKA, CCNA2, CENPF, MYC, RAD51AP1) in (LNCaP)-Abl and (LNCaP)-MDVR cells treated with 50  $\mu$ M dilazep for 48 hrs. T-test was used for statistical analysis (significance set at  $P < 0.05$ ).

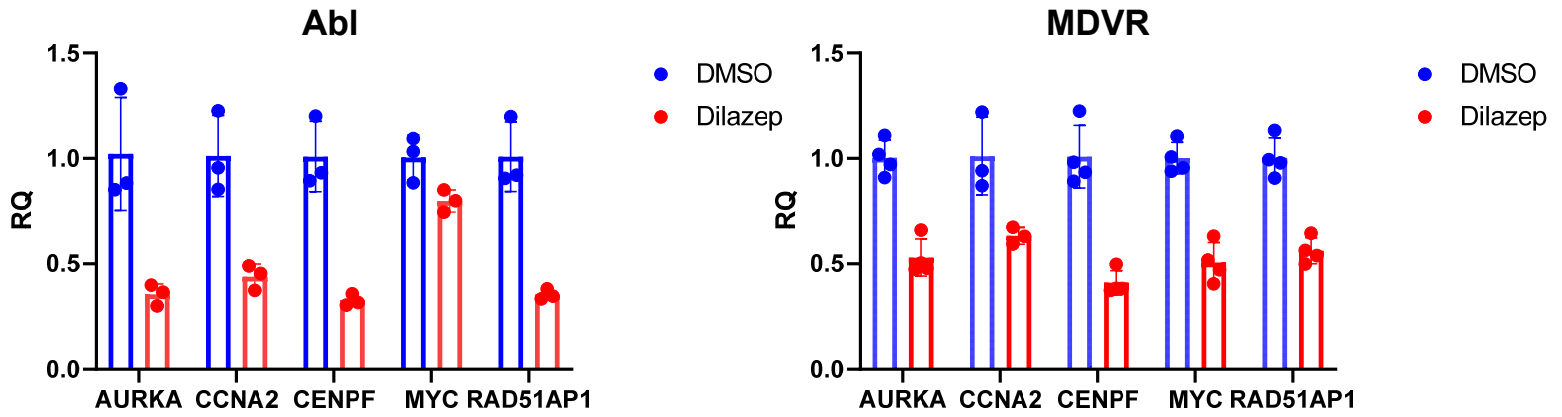

Supplement: supplementary_figure_8.pdf [file supplementary_figure_8.pdf]
