# Supplementary material for: Inhibition of GATA2 in prostate cancer by a clinically available small molecule
Source: PubMed Central journal article supplement (PMC8634153; doi:10.1530/erc-21-0085), 2021-10-12
Supplement: supplementary_figure_11.pdf [file supplementary_figure_11.pdf]

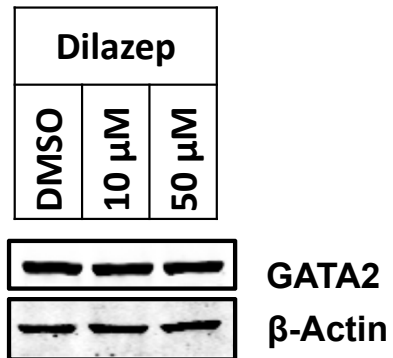

Dilazep treatment in LNCaP cells for 16 hrs does not suppress total GATA2 protein levels.
