# Supplementary material for: Inhibition of GATA2 in prostate cancer by a clinically available small molecule
Source: PubMed Central journal article supplement (PMC8634153; doi:10.1530/erc-21-0085), 2021-10-12
Supplement: supplementary_material.pdf [file supplementary_material.pdf]

## Supplementary Text

The PSA61-Luc plasmid (Cleutjens et. al. 1997 Molecular Endocrinology) carries a 6-kb fragment of the promoter/enhancer region of the PSA/KLK3 gene. This fragment harbors a 440-bp regulatory region (shown underlined) which contains three GATA2 binding motifs and one ARE. Two additional AREs and several GATA2 binding motifs are also present on this plasmid further downstream, prior to the luciferase gene.

**The green letter A is the transcription start site of KLK3**

**Three AREs are shown highlighted in yellow.**

**GATA2 consensus binding sequences W/GATA/R, where W can be A or T and R can be A or G, are highlighted in turquoise.**

5' end of a sequence 6000bp upstream of KLK3 TSS:

CATCTCTGTGACTCATGTTATTGTACTTTAAAGTGGAAATAATAACAGTTCCTGTACAGTTTAGGGCTTCCCAAGATGACCCTCCATTGACATCAGTTGAGATT  
CCAGGAGAGTCCAAAAGATCATCCTTAAGGTTCAAGTCTGCTAGGATGCTCATGGTTGTGGTTTATTACAGCAAAGGATACAGATGAAAACTGGCAAGGG  
AGAGGTGAATGAGGCAAAGACAAGGAGAAGCTCAAAGTGGAAAGCTTCTAGTTTTCTTTCCCGGTGACATCGTGAAAGCACTAGCATCTCTAAGCAATGATCT  
GTGACAATATTACAGTGTATTGCCATCCAGGGAAGCTCAACTGAGCCTTGATGTCCAGAGATTTTTGTGTTTTTTCTGAGACTGAGTCTCGCTCTGTGCCAG  
GCTGGAGTGCAGTGGTCAACCTTGGCTCACTGCAAGCTCCGCCTCCTGGGTTACGCCATTCTCCTGCCTCAGCCTCCTGAGTAGCTGGGACTACAGGCACCC  
GCCACCAGCCTGGCTAATTTTTTGTATTTTTAGTAGAGATGGGGTTCACTGTGTTAGCCAGGATGGTCTCAGTCTCCTGACCTCGTGATCTGCCACCTTG  
GCCTCCCAAAGTGTGGGATTACAGGGGTGAGCCACTGCGCCTGGCCGATCCAGAGATTTTTGGGGGGCTCCATCACACAGACATGTTGACTGTCTTATG  
GTTGACTTTTAGTATCCAGCCCTCTAGAAATCTAGCTGATATAGTGTGGCTCAAACCTTCAGCACAAATCACACCGTTAGActatctGGTGTGGCCAAAC  
CTTCAGGTGAACAAAGGCCTCTAAACTGGCAGGATATTCAAAGCATTAGAGATGACCTCTGCAAAGAAAAAGAAATGAAAAGAAAAAGAAAGAAAGAAA  
AAAAAAGAGATGACCTCTCAGGCTCTGAGGGGAAACGCCTGAGGTCTTTAGCAAGGTGAGTCTGTTGCACAGTCTCCCTCACAGGGTCATTG  
TGACGATCAAATGTGGTACGTTATGAGGCACAGCAGATGCCTGGCTCTGGGAGTGCCTGTAAGTGTATGCTTGCAGTCTGATGGCTGGGATGTGCA  
GGGAttatctTCAGCATTACAGATGCTCATCTCATCCTCACAGCATCACTATGGGATGGGATTACTGGCTCATTGATGGAGAACTGGCTGTGGCTCAG  
AAAGGGGGACCCTAGACCAGGACACTCTGGATGCTGGGACTCCAGAGACCATGACCACTCACCAACTGCAGAGAAATTAATGTGGCTGATGCTCCTGT  
CCTGGAGAGGGTGGAGGTGGACCTTCACTAACCTCCTACCTTGACCCTCTTTTAGGGCTCTTTCTGACCTCCACCATGATACTAGGACCCATTGTATTCTG  
TACCCTTTGACTCTATGACCCCACTGCCACTGCATCCAGCTGGTCCCCTctatctTATTCCCAGCTGGCCAGTGCAGTCTCAGTCCCACCTGTTG  
TCAGTAACTCTGAAGGGGTGACATTTACTGACTTGCAAACAAATAAGCTAACTTTCCAGAGTTTTGTGAATGCTGGCAGAGTCCATGAGACTCCTGAGTCAG  
AGGCAAAGGCTTTACTGCTCACAGCTTAGCAGACAGCATGAGGTTGATGTTACATAGTACACCTTGCCCCCAAACTTTGTAGGGTGACCAGAGCAGTC  
TAGGTGGATGCTGTGCACAGGGGTTGTGCCACTGGTGAACCTGAGATTAGGAATCCTCAATCTTACTGGGACAACCTGCAAACCTGCTCAGCCTTTG  
TCTCTGATGAAGATAtatctTCATGATCTTGGATTGAAAACAGACCTACTCTGGAGGAACATATTGTATCGATTGTGCTTGCAGAGTAAACAAATCTGTTGTA  
AGAGACAttatctTTAttatctAGGACAGTAAGCAAGCCTGGATCTGAGAGAGATATCATCTTGCAAGGATGCCTGCTTTACAACATCCTTGAACAACAAT  
CCAGAAAAAAGGTGTTGCTGCTTTGCTCAGAAGACACAGATACGTGACAGAACCATGGAGAATTGCCTCCCAACACTGTTCCAGCCAGAGCCTCCACC  
CTTGTCTGCAGGACAGTCTCAAGCTTCCACCATTAATACTTCTTGTACATCCTGCTTATTTATGCCTAACCAAGGTTCTAGGTCCCGATCGACTGTGCT  
GGCAGCACTCCACTGCCAAACCAGAAATAAGGCAGCGCTCAGGATCCGAAAGGGGATGGCTGGGGATCAGAATCTGGGTTGAGTGAAGGAGTGGTCCACC  
CTCTTGAATTTCAAAGGAGGAAGAGGCTGGATGTGAAGGAACTGGGGAGGGAAAGTGTGAGTCCGAACTCTTAGGTCAATGAGGGAGGAGACTGGTAAGGTC  
CCAGCTCCCGAGGTACTGATGTGGGAATGGCCTAAGAATCTCATATCCTCAGGAAGAAGGTGCTGGAAATCCTGAGGGGTAGAGTCTGGGTATATTTGTGGCTT  
AAGGCTCTTTGGCCCTGAAGGGCAGAGGCTGGAACCATTAGTCCAGGGTTGGGGtgatagTAATGGGATCTCTGATTCTCAAGAGTCTGAGGATCGAG  
GGTTGCCATTCTTCCATCTTCCACCTAATCCTTACTCCACTTGAGGGTATCACCAGCCCTTAGCTCCATGAAGGTGCCCTGGGCAAGCACAATCTGAGC  
ATGAAAGATGCCCCAGAGGCTTGGGTGTCATCCACTCATATCCAGCATCCACTCTGAGGGTGTGGCCAGCACCATGACGTCATGTTGCTGTGACTATCCC  
TGACGGTGCCTCTCCAGCCACTGCCAACCGTAGAGCTGCCGACATCCTCCTGTTGGGAGTGGCCTGCATGGTGCAGGCTGAGGCTAGTGTGACAGAGG  
GAGCCTGGAATCATAGGATCCAGGACTCAAAGTGTAGAGAATGGCCATATGTCACCATCCATGAAATCTCAAGGGCTTCTGGGTGGAGGGCACAGGGACCT  
GAACTTATGGGTTTTCCCAAGTCTATTGCTCTCCAAGTGTGCTCCAGATACGAGGCAGTGTGCCAGCATAGCCtatctCCACCACATCTTGTAAAAG  
GGACTACCCAGGGCCTGATGAACACCATGGTGTGTACAGGAGTAGGGGTGGAGGCACGGACTCCTGTGAGGTACAGCCAAAGGAGCATCATGAGGTGGG  
GAGGAGCAATGGACAGGCTTGAACGGGGATGTGGTTGATTTGGTTTTCTTGGTtagataaAGTGTGGTATAGGATTGAGAGTGGAGTATGAAGACC

AGTTAGGATGGAGGATCAGATTGGAGTTGGGTTAGAGATGGGGTAAAAATTGTGCTTCGGATGAGTTGGGATTGACACTGTGGAGGTGGTTGGGATGGCATGG  
CTTTGGGATGGAAATAGATTTGTTTTGATGTTGGCTCAGACATCCTGGGGATTGAACGGGGATGAAGCTGGGTTTGATTTGGAGGTAGAAGACGTGGAAGT  
AGCTGTGAGATTTGACAGTGGCCATGAGTTTTGTTGATGGGGAATCAAACAATGGGGGAAGACATAAGGGTTGGCTTGTAGGTTAAGTTGCGTTGGGTTGAT  
GGGGTCGGGGCTGTGTATAATGCAGTTGGATTGGTTTTGATTAATAATTGGGTTGGGTGAGTTTTGGTTGAGGATGAGTTGAGGATATGCTTGGGACACCGGAT  
CCATGAGGTTCTCACTGGAGTGGAGACAAACTTCCCTTCCAGGATGAATCCGGGGAAGCCTTAATCACGTGTAGGGGAGGTGAGGCCACTGGCTAAGTATATC  
CTTCCACTCCAGCTCTAAGATGGTCTAAATTGTGATttatctATATCCACCTCTGTCTCCCTCACTGTGCTTGGAGTTACCTGATCACTCAACTAGAAACAG  
GGGAAGATTttatcaAATTCTTTTTTTTTTTTTTTTTTTTTTTTTGAGACAGAGTCTCACTCTGTTGCCCAGGCTGGAGTGCAGTGGCGCAGTCTCGGCTCACTG  
CAACCTCTGCCTCCAGGTTCAAGTATTCTCCTGCCTCAGCCTCCTGAGTTGCTGGGATTACAGGCATGCAGCACCATGCCAGCTAATTTTTGTATTTTTAG  
TAGAGATGGGTTTTACCAATGTTTGGCAGGCTGGCCTCGAACTCCTGACCTGGTATCCACCTGCCTCAGCCTCCCAAAGTCTGGGATTACAGGCCTCAGCC  
ACCGCGCCAGCCACTTTTGTCAAATCTTGAGACACAGCTGGGCTGGATCAAGTGAAGTACTCTGGTTTTATTGAACAGCTGAAATAACCAACTTTTTGGAA  
ATTGATGAAATCTTACGGAGTTAACAGTGGAGTACCAGGGCTCTTAAGAGTCCCGATTCTCTTCTGAGACTACAAATTGTATTTGCATGCCACCTAATC  
TTTTTTTTTTTTTTTTAAATCGAGGTTTCAGTCTATTCTATTTCCAGGCTGGAGTTCAATGGCGTGTACAGCTCACTGTAGCCTGAACTCCTGGCCTT  
AAGAGATTCTCCTGCTTCGGTCTCCCAATAGCTAAGACTACAGTAGTCCACCACCATATCCagataaTTTTTAAATTTTTGGGGGGCCGGGCACAGTGGCTC  
ACGCCTGTAATCCCAACACCATGGGAGGCTGAGATGGGTGGATCACGAGGTGAGGAGTTGAGACCAGCCTGACCAACATGGTAAACTCTGTCTACTAAAA  
AAAAAAAAATAGAAAAATTAGCCGGGCGTGGTGGCACACGGCACCTGTAATCCAGCTACTGAGGAGGCTGAGGCAGGAGAATCACTTGAACCAGAAGGCAG  
AGGTTGCAATGAGCCGAGATTGGCCACTGCACCTCCAGCCTGGGTGACAGAGTGAAGTCTGTCTCAAAAAAAAAAATTTTTTTTTTTTTTTGTAGAGATGG  
ATCTTGCTTTGTTTCTCTGTTGGCCTTGAACCTCCTGGCTTCAAGTATCCTCCTACCTTGGCCTCGGAAAGTGTGGGATTACAGGCCTGAGCCACCATGACT  
GACCTGTCTGTTAATCTTGAGGTACATAAACCTGGCTCCTAAAGGCTAAATATTTTGTGGAGAAGGGGCATTGGATTTGCATGAGGATGATTCTGACCTGGG  
AGGGCAGGTCAGCAGGCATCTCTGTTGCACagatagAGTGCACAGGTCTGGAGAACAAGGAGTGGGGGTATTGGAATTCACATTGTTTGTGCACGTTGG  
ATTTTAAATGCTAGGGAACCTTTGGGAGACTCATATTTCTGGGCTAGAGGATCTGTGGACCACAAGATCTTTTTATGATGACAGTAGCAATGTATCTGTGGAGC  
TGGATTCTGGGTTGGGAGTGAAGGAAAAGAATGACTAAATGCCAAGACATCTATTTGAGGAGCATGAGGAATAAAAGTTCTAGTTTCTGGTCTCAGAGTGGT  
GCAGGGATCAGGGAGTCTCACAATCTCCTGAGTGTGGTGTCTTAGGGCACACTGGGTCTTGGAGTCAAAGGATCTAGGCACGTGAGGCTTTGTATGAAGAAT  
CGGGGATCGTACCCACCCCTGTTTCTGTTTCATCCTGGGCGTGTCTCCTCTGCCTTTGTCCCTAGATGAAGTCTCCATGAGCTACAGGGCCTGGTGCATCCA  
GGGTGATCTAGTAATTCAGAACAGCAAGTGCTAGCTCCTCCCTCCCTTCCACAGCTCTGGGTGTGGGAGGGGTTGTCCAGCCTCCAGCAGCATGGGGAGGGC  
CTTGGTCAGCCTCTGGGTGCCAGCAGGGCAGGGGCGGAGTCTGGGGAATGAAGTTTTATAGGGCTCCTGGGGAGGCTCCCCA
